# Supplementary material for: Insulin increases sensory nerve density and reflex bronchoconstriction in obese mice
Source: JCI journal article supplement (doi:10.1172/jci.insight.161898), 2022-09-15
Supplement: sd1 [file 1]

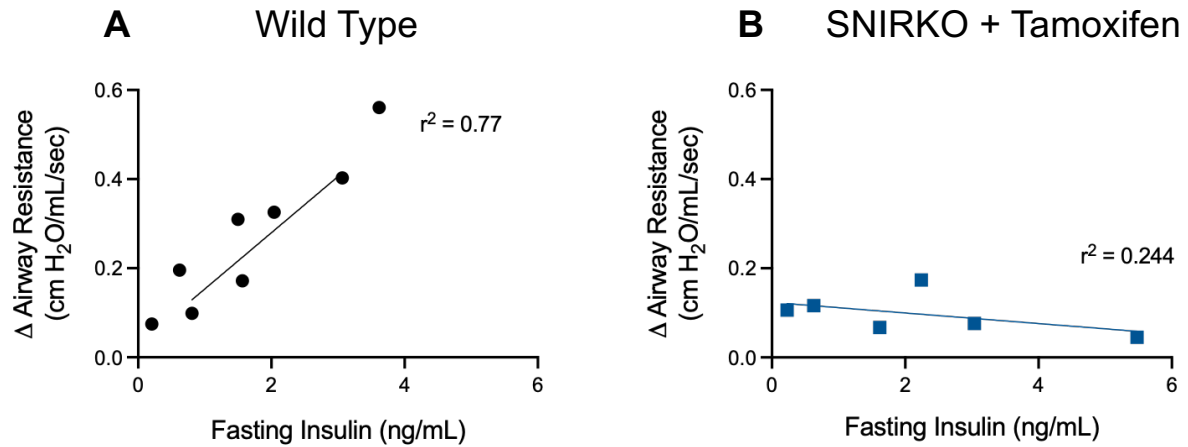

**Supplemental Figure 1.** Change in airway resistance increased with fasting insulin in wild type but not SNIRKO mice. Airway resistance in response to 300 mM 5-HT directly correlates with fasting insulin in wild type (A) but not SNIRKO (B) mice. Each data point represents an individual animal. (n = 6-8). Simple linear regression.
